# Supplementary material for: The Effect of an Educational Program based on the Information-Motivation-Behavioral Skill Model on Medication Adherence among Patients with Pulmonary Tuberculosis
Source: Research Square preprint supplement (doi:10.21203/rs.3.rs-6130200/v1), 2025-04-17
Supplement: Supplementary file 1 [file 02f4525d19c7a4c458557ae5.pdf]

**Investigate the effect of an empowerment program based on the information, motivation, and behavioral skills model on adherence to treatment regimen among tuberculosis patients**

**Dear patients;**

Thank you for taking the time to answer the questions carefully and do not leave any unanswered. Your answers will be kept strictly confidential and the results of this study will be published in medical and health journals, so the information obtained will not be used to identify you in any way. We thank you for your effort in completing the questionnaire.

**Questionnaire code:** .....

**Demographic and contextual variables**

**Group:** Intervention ☐ control ☐

**Age:** .....

**Gender:** Male ☐ Female ☐

**Occupation:** Housekeeper ☐ Employed ☐ Jobless ☐

**Marital status:** Single ☐ Married ☐ Widowed ☐ Divorced ☐

**Education:** Reading and writing ☐ Junior high school and above ☐

**Place of residence:** City ☐ Vilaage ☐ Suburb ☐

| Row | <u>Information</u>                                                                                       | Strongly disagree | Somehow disagree | Neutral | Somehow agree | Strongly agree |
|-----|----------------------------------------------------------------------------------------------------------|-------------------|------------------|---------|---------------|----------------|
| 1   | I know about the effectiveness of drugs against tuberculosis                                             |                   |                  |         |               |                |
| 2   | When my cough subsided after taking anti-TB drugs and I felt healthy, I don't need to take anti-TB drugs |                   |                  |         |               |                |
| 3   | I know what possible side effects each of the anti-TB drugs has for me                                   |                   |                  |         |               |                |
| 4   | I know what to do if anti-TB drugs interact with alcohol, drugs, or other medications                    |                   |                  |         |               |                |
| 5   | I have to take anti-tuberculosis drugs for at least 6 months                                             |                   |                  |         |               |                |

| Row | <u>Individual motivation</u>                                                                        | Strongly disagree | Somehow disagree | Neutral | Somehow agree | Strongly agree |
|-----|-----------------------------------------------------------------------------------------------------|-------------------|------------------|---------|---------------|----------------|
| 1   | Anti-TB drugs shorten my lifespan                                                                   |                   |                  |         |               |                |
| 2   | The relatively long use of anti-tuberculosis drugs has made me hopeless                             |                   |                  |         |               |                |
| 3   | Belief in God has led me to always take anti-tuberculosis medication                                |                   |                  |         |               |                |
| 4   | Side effects of medications, such as joint pain and dark urine, have reduced my desire to take them |                   |                  |         |               |                |
| 5   | Anti-TB drugs help control my                                                                       |                   |                  |         |               |                |

|   |                                                                                                     |  |  |  |  |  |
|---|-----------------------------------------------------------------------------------------------------|--|--|--|--|--|
|   | disease                                                                                             |  |  |  |  |  |
| 6 | I live a normal life like the rest of society, despite taking medication for a relatively long time |  |  |  |  |  |

| Row | <u>Social motivation</u>                                                                                               | Strongly disagree | Somehow disagree | Neutral | Somehow agree | Strongly agree |
|-----|------------------------------------------------------------------------------------------------------------------------|-------------------|------------------|---------|---------------|----------------|
| 1   | I am not willing to take anti-TB drugs because if people around me see me in a TB treatment center, they will avoid me |                   |                  |         |               |                |
| 2   | Free counseling and medication services have created incentives to take medication                                     |                   |                  |         |               |                |
| 3   | I feel bad for the TB treatment center staff because, like at the police station, I have to answer to them             |                   |                  |         |               |                |
| 4   | I do not go to a TB treatment center because of the travel costs and lack of time to follow up on the disease          |                   |                  |         |               |                |
| 5   | Hidden feelings about tuberculosis and unmet confidential needs have made me desperate to take medication              |                   |                  |         |               |                |
| 6   | People around me prevent me from visiting the center for follow-up care                                                |                   |                  |         |               |                |

| Row | <u>Risk perception</u>                                                                         | Strongly disagree | Somehow disagree | Neutral | Somehow agree | Strongly agree |
|-----|------------------------------------------------------------------------------------------------|-------------------|------------------|---------|---------------|----------------|
| 1   | Not taking my medications on time makes my body weak                                           |                   |                  |         |               |                |
| 2   | If I don't take anti-tuberculosis drugs on time, the complications of tuberculosis will worsen |                   |                  |         |               |                |
| 3   | If I take anti-tuberculosis drugs on time, my life expectancy will be shortened                |                   |                  |         |               |                |
| 4   | Tobacco and drug use make anti-tuberculosis drugs ineffective                                  |                   |                  |         |               |                |

| Row | <u>Self-efficacy</u>                                                                            | Always | Usually | Sometimes | Rarely | Never |
|-----|-------------------------------------------------------------------------------------------------|--------|---------|-----------|--------|-------|
| 1   | I can take anti-TB medications regularly while traveling                                        |        |         |           |        |       |
| 2   | I have the ability to remember to take my anti-tuberculosis medication even during celebrations |        |         |           |        |       |
| 3   | I can take my medications without help from others                                              |        |         |           |        |       |
| 4   | I can repeat the skills of taking and administering medications several times to be successful  |        |         |           |        |       |
| 5   | I am able to take medications even though they taste bad                                        |        |         |           |        |       |
| 6   | I can still take my medications despite pressure from friends and family to stop taking them    |        |         |           |        |       |

| Row | <u>Behavior</u>                                                                                                                         | Always | Usually | Sometimes | Rarely | Never |
|-----|-----------------------------------------------------------------------------------------------------------------------------------------|--------|---------|-----------|--------|-------|
| 1   | I am well versed in the side effects of medications and take anti-TB medications every day, despite the mild side effects and bad taste |        |         |           |        |       |
| 2   | I store medications at a temperature (below 33 degrees Celsius)                                                                         |        |         |           |        |       |
| 3   | I don't take my pills when others are around me so they don't know about my illness                                                     |        |         |           |        |       |
| 4   | I take my pills according to my schedule, no matter what (travel, illness, fatigue, busy work)                                          |        |         |           |        |       |
| 5   | I am constantly doing my tests to check the status of the disease                                                                       |        |         |           |        |       |
